# Supplementary material for: aP2-Cre Mediated Ablation of GHS-R Attenuates Adiposity and Improves Insulin Sensitivity during Aging
Source: PubMed Central journal article supplement (PMC6213105; doi:10.3390/ijms19103002), 2018-10-01
Supplement: ijms-19-03002-s001.pdf [file ijms-19-03002-s001.pdf]

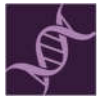

Supplementary Material

## *aP2*-Cre Mediated Ablation of GHS-R Attenuates Adiposity and Improves Insulin Sensitivity during Aging

Ligen Lin <sup>1,2</sup>, Jong Han Lee <sup>1,3</sup>, Ruitao Wang <sup>4</sup>, Ru Wang <sup>5</sup>, David Sheikh-Hamad <sup>6</sup>, Qun S. Zang <sup>7</sup> and Yuxiang Sun <sup>1,8,\*</sup>

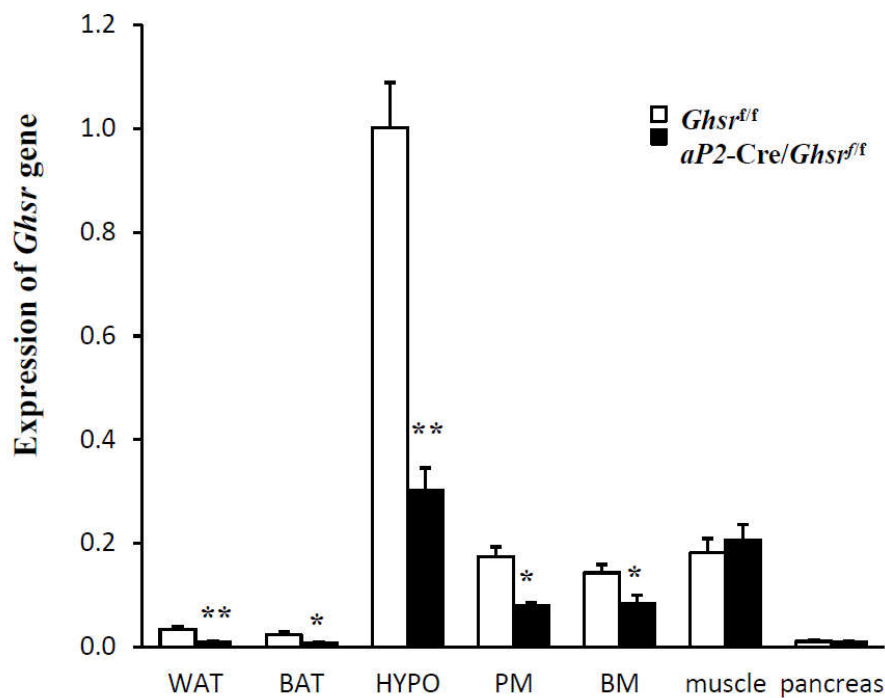

**Supplemental Figure S1.** Expression of *Ghsr* gene in different tissues from *Ghsr*<sup>ff</sup> and *aP2-Cre/Ghsr*<sup>ff</sup> mice. WAT: white adipose tissue; BAT: brown adipose tissue; HYPO: hypothalamus; PM: peritoneal macrophages; BM: bone marrow.  $n = 6-12$  in each group. \*  $P < 0.05$ , \*\*  $P < 0.001$ , *Ghsr*<sup>ff</sup> vs. *aP2-Cre/Ghsr*<sup>ff</sup>.

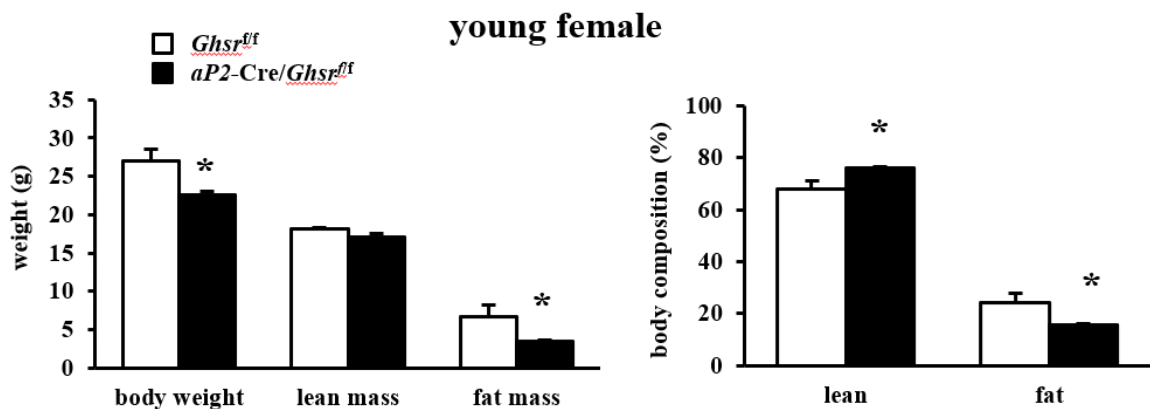

**Supplemental Figure S2.** Metabolic profile of female *aP2-Cre/Ghsr*<sup>ff</sup> mice. Body weight and body composition of 5–6 month-old female *Ghsr*<sup>ff</sup> and *aP2-Cre/Ghsr*<sup>ff</sup> mice.  $n = 5$  in each group. \*  $P < 0.05$ , *Ghsr*<sup>ff</sup> vs. *aP2-Cre/Ghsr*<sup>ff</sup>.
